# Supplementary material
Source: publisher figshare collection journal article supplement (https://karger.figshare.com/ndownloader/files/30981391)
Supplement: Supplementary file 1 [file 30981391]

| Supplemental Table 2 | | The mean values of distances from all points on the mask to the cochlear base (CB) | | | | | | | |
| --- | --- | --- | --- | --- | --- | --- | --- | --- | --- |
|  |  | A (25mm) | B (30mm) | C (35mm) | D (40mm) | P | Pab | Pac | Pad |
| Control group | P20 | 40.05 ± 1.87 | 42.71 ± 1.68 | 45.68 ± 1.59 | 48.65 ± 1.47 | <0.05 | <0.05 | <0.05 | <0.05 |
| N=30 | P30 | 40.37 ± 1.79 | 43.18 ± 1.65 | 46.27 ± 1.44 | 49.31 ± 1.47 | <0.05 | <0.05 | <0.05 | <0.05 |
|  | P40 | 40.60 ± 1.74 | 43.62 ± 1.62 | 46.63 ± 1.51 | 49.92 ± 1.46 | <0.05 | <0.05 | <0.05 | <0.05 |
| CAA group | P20 | 41.61 ± 1.81 | 44.24 ± 1.74 | 47.81 ± 1.78 | 50.29 ± 2.60 | <0.05 | <0.05 | <0.05 | <0.05 |
| N=30 | P30 | 42.30 ± 1.92 | 44.92 ± 1.83 | 47.77 ± 1.79 | 50.77 ± 1.84 | <0.05 | <0.05 | <0.05 | <0.05 |
|  | P40 | 42.93 ± 2.04 | 45.59 ± 1.96 | 48.50 ± 1.99 | 51.63 ± 2.03 | <0.05 | <0.05 | <0.05 | <0.05 |
| CAS group | P20 | 40.56 ± 0.91 | 43.19 ± 0.96 | 45.93 ± 0.92 | 48.78 ± 0.85 | <0.05 | <0.05 | <0.05 | <0.05 |
| N=30 | P30 | 41.15 ± 0.93 | 43.87 ± 1.01 | 46.45 ± 1.36 | 49.75 ± 1.13 | <0.05 | <0.05 | <0.05 | <0.05 |
|  | P40 | 41.17 ± 1.91 | 44.56 ± 0.99 | 47.59 ± 1.12 | 50.66 ± 1.24 | <0.05 | <0.05 | <0.05 | <0.05 |
| Pab, Pac, Pad = p value for differences between A and B, between A and C, and between A and D, respectively | | | | | | | | | |
